# Supplementary material
Source: PubMed Central journal article supplement (PMC2720922)

|              |   |   |   |   |
|--------------|---|---|---|---|
| <b>IGF-I</b> | - | + | + | + |
| <b>LY</b>    | - | + | - | - |
| <b>UO</b>    | - | - | + | - |

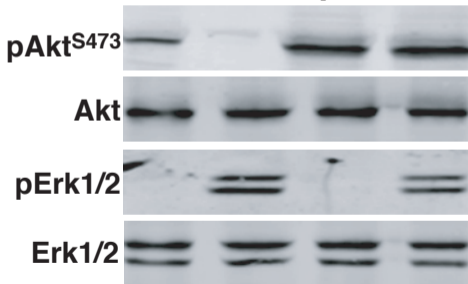

Supplement: supp_122_5_716__1.pdf [file supp_122_5_716__1.pdf]

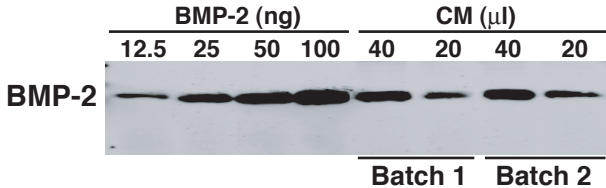

Supplement: supp_122_5_716__2.pdf [file supp_122_5_716__2.pdf]
